# Supplementary material for: SARS‐CoV2 pneumonia recovery is linked to expansion of innate lymphoid cells type 2 expressing CCR10
Source: PubMed Central journal article supplement — Eur J Immunol. 2021 Oct 20;51(12):3194–201. doi: 10.1002/eji.202149311 (PMC8646914; doi:10.1002/eji.202149311), 2021-10-20
Supplement: EJI-51-3194-s001.pdf [file EJI-51-3194-s001.pdf]

SARS-CoV2 pneumonia recovery is linked to expansion of Innate Lymphoid Cells type 2  
expressing CCR10.

André MC Gomes<sup>1,2</sup>, Guilherme B. Farias<sup>1</sup>, Manuel Dias-Silva<sup>1</sup>, Joel Laia<sup>1</sup>, Amelia C.  
Trombetta<sup>1</sup>, Ana Godinho-Santos<sup>1</sup>, Pedro Rosmaninho<sup>1</sup>, Diana F. Santos<sup>1</sup>, Carolina M.  
Conceição<sup>1</sup>, Renato Costa-Reis<sup>3</sup>, Maria Adão-Serrano<sup>1,3</sup>, Catarina Mota<sup>1,4</sup>, Afonso R.M.  
Almeida<sup>1</sup>, Ana E. Sousa<sup>1</sup>, Susana M. Fernandes<sup>1,2,3</sup>

<sup>1</sup> Instituto de Medicina Molecular João Lobo Antunes, Faculdade de Medicina,  
Universidade de Lisboa, 1649-028 Lisboa, Portugal

<sup>2</sup> Clínica Universitária de Medicina Intensiva, Faculdade de Medicina, Universidade de  
Lisboa, 1649-028 Lisboa, Portugal

<sup>3</sup> Serviço de Medicina Intensiva, Centro Hospitalar Universitário Lisboa Norte, 1649-028  
Lisboa, Portugal

<sup>4</sup> Serviço de Medicina II, Hospital de Santa Maria, Centro Hospitalar Universitário Lisboa  
Norte, 1649-028 Lisboa, Portugal

Supplementary Tables and Figures

**Supplementary Table 1. Clinical Parameters at Admission and Recovery**

| Parameter                                      | Admission             | Recovery              | P value       | Controls           |
|------------------------------------------------|-----------------------|-----------------------|---------------|--------------------|
| Lymphocytes / $\mu$ l                          | 910 (818 - 1481)      | 1845 (1340 - 2415)    | <b>0.0085</b> | 2046 (1606 - 2793) |
| Neutrophils / $\mu$ l                          | 5599 (3545 - 8379)    | 4484 (3473 - 11281)   | 0.5416        | 3228 (2699 - 6525) |
| Lymphocyte/Neutrophil ratio                    | 0.18 (0.11 - 0.48)    | 0.39 (0.16 - 0.63)    | 0.2813        | 0.51 (0.41 - 0.69) |
| Eosinophils / $\mu$ l                          | 12 (6 - 33)           | 46 (26 - 118)         | <b>0.0245</b> | 188 (80 - 364)     |
| Basophils/ $\mu$ l                             | 24 (15 - 37)          | 26 (15 - 49)          | 0.5416        | 38 (24 - 70)       |
| Monocytes / $\mu$ l                            | 435 (277 - 714)       | 517 (389 - 770)       | 0.1937        | 423 (351 - 749)    |
| T cells (CD3 <sup>+</sup> ) / $\mu$ l          | 375 (285 - 751)       | 802 (737 - 1408)      | <b>0.0009</b> | 1285 (879 - 1663)  |
| B cells (CD19 <sup>+</sup> ) / $\mu$ l         | 82 (45 - 132)         | 214 (134 - 369)       | <b>0.0009</b> | 187 (134 - 286)    |
| CD4 <sup>+</sup> T cells / $\mu$ l             | 223 (122 - 321)       | 524 (382 - 865)       | <b>0.0031</b> | 768 (544 - 998)    |
| CD8 <sup>+</sup> T cells / $\mu$ l             | 155 (78 - 261)        | 301 (162 - 467)       | <b>0.0052</b> | 414 (158 - 577)    |
| NK cells / $\mu$ l                             | 92 (60 - 185)         | 92 (53 - 153)         | <b>0.8552</b> | 249 (146 - 286)    |
| $\gamma\delta$ T cells / $\mu$ l               | 18 (11 - 42)          | 32 (18 - 75)          | <b>0.0353</b> | 29 (16 - 55)       |
| P/F                                            | 185.4 (116.1 - 279.2) | 336.9 (277.6 - 448.8) | <b>0.0001</b> | ND                 |
| C-reactive protein (mg/dl)                     | 11.64 (5.24 - 26.85)  | 0.90 (0.39 - 4.65)    | <b>0.0195</b> | ND                 |
| Procalcitonin (ng/ml)                          | 0.20 (0.13 - 1.04)    | 0.10 (0.05 - 0.15)    | <b>0.0078</b> | ND                 |
| Ferritin (mg/dL)                               | 1164 (521 - 1906)     | 993 (372 - 1290)      | 0.2500        | ND                 |
| D- dimers (g/ml)                               | 0.55 (0.25 - 0.83)    | 0.43 (0.24 - 0.75)    | 0.2188        | ND                 |
| LDH (U/L)                                      | 380 (251 - 479)       | 293 (278 - 362)       | <b>0.0391</b> | ND                 |
| AST (U/L)                                      | 33 (25 - 51)          | 34 (18 - 67)          | 0.8438        | ND                 |
| ALT (U/L)                                      | 44 (30 - 60)          | 54 (37 - 157)         | 0.1484        | ND                 |
| Creatinin (mg/dl)                              | 0.8 (0.70 - 1.02)     | 0.74 (0.51 - 0.98)    | <b>0.0391</b> | ND                 |
| SARS-CoV2 specific IgM titer                   | 800 (300 - 2400)      | 3200 (1200 - 9600)    | <b>0.0205</b> | ND                 |
| SARS-CoV2 specific IgG titer                   | 400 (0 - 4800)        | 12800 (6400 - 25600)  | <b>0.0002</b> | ND                 |
| SARS-CoV2 specific IgA titer                   | 1600 (800 - 4800)     | 12800 (2400 - 25600)  | <b>0.0161</b> | ND                 |
| SARS-CoV2 plasma viral load (cps/ml of plasma) | 36 (11 - 150)         | Undetectable          | <b>NA</b>     | ND                 |

Data are presented as Median (Interquartile Range). Comparison of 14 patients at admission and recovery time-points using a Wilcoxon matched-pairs signed rank test. *P* values <0.05 were considered significant and are highlighted in bold. Data from the 9 studied controls are shown. P/F – arterial oxygen partial pressure/fractional inspired oxygen. ND – not done. NA – not applicable.

**Supplementary Table 2. Parameters from COVID-19 Patients and Healthy Controls**

| Parameter                       | COVID-19 patients                  |                                    | P value       | Controls              |
|---------------------------------|------------------------------------|------------------------------------|---------------|-----------------------|
|                                 | Admission                          | Recovery                           |               |                       |
| ILC1/ul                         | 1 (1 - 3)                          | 6 (3 - 9)                          | <b>0.0005</b> | 7 (4 - 14)            |
| CD161-ILC1/ul                   | 1 (0.46 - 2.10)                    | 4 (2 - 6)                          | <b>0.0005</b> | 5 (3 - 12)            |
| %CD161- in ILC1                 | 80 (63 - 94)                       | 88 (59 - 94)                       | 0.3105        | 88 (79 - 94)          |
| %CD161+ in ILC1                 | 17.85 (4.93 - 32.55)               | 8.7 (5.15 - 36.30)                 | 0.3575        | 11.50 (5.47 - 20.10)  |
| CD161+ ILC1/ul                  | 0.09 (0.06 - 0.99)                 | 0.71 (0.25 - 2.54)                 | <b>0.0010</b> | 0.70 (0.49 - 1.29)    |
| %CD69 in ILC1                   | 3 (2 - 11)                         | 2 (1 - 3)                          | <b>0.0142</b> | 1.63 (0.95 - 1.93)    |
| %CD69+ in CD161+ ILC1           | 20 (6 - 37)                        | 5 (3 - 30)                         | <b>0.0266</b> | 6 (4 - 8)             |
| %CD69+ in CD161- ILC1           | 2 (1 - 4)                          | 1 (1 - 2)                          | 0.0681        | 0.66 (0.60 - 1.06)    |
| %CD56 in ILC1                   | 6 (2 - 12)                         | 4 (2 - 8)                          | 0.1294        | 4 (2 - 6)             |
| %CD56+ in CD161+ ILC1           | 18 (7 - 33)                        | 15 (4 - 25)                        | 0.4973        | 10 (9 - 25)           |
| %CD56+ in CD161- ILC1           | 3 (2 - 10)                         | 2 (1 - 3)                          | <b>0.0017</b> | 1 (1 - 4)             |
| MFI CD56 in CD56+ ILC1          | 2132 (1873 - 3129)                 | 2969 (2427 - 3967)                 | <b>0.0171</b> | 2485 (2193 - 3758)    |
| MFI CD56 in CD161+ CD56+ ILC1   | 2271 (1876 - 3606)                 | 2723 (1988 - 3167)                 | 0.4973        | 2411 (2213 - 3171)    |
| MFI CD56 in CD161- CD56+ ILC1   | 2565 (1575 - 3386)                 | 3388 (2864 - 4141)                 | <b>0.0105</b> | 2899 (2599 - 4020)    |
| CCR10+ ILC1/ul                  | 0.07 (0.04 - 0.17)                 | 0.54 (0.19 - 0.91)                 | <b>0.0005</b> | 0.46 (0.34 - 1.06)    |
| %CCR10 in ILC1                  | 9 (3 - 11)                         | 7 (5 - 15)                         | 0.4548        | 8 (4 - 15)            |
| %CCR10+ in CD161+ ILC1          | 1.69 (0.42 - 7.06)                 | 2.88 (0.48 - 13.05)                | 0.2974        | 4 (1 - 6)             |
| %CCR10+ in CD161- ILC1          | 8 (4 - 13)                         | 8 (5 - 10)                         | 0.8394        | 7 (3 - 12)            |
| CCR10 MFI in CCR10+ ILC1        | 2969 (2564 - 4227)                 | 3649 (3123 - 4491)                 | 0.6355        | 2339 (2074 - 2549)    |
| CCR10 MFI in CCR10+ CD161- ILC1 | 2619 (2240 - 3690)                 | 3413 (2652 - 4391)                 | 0.2654        | 2236 (1888 - 2506)    |
| CCR10 MFI in CCR10+ CD161+ ILC1 | 2103 (1567 - 2841)                 | 2236 (1701 - 2737) <sup>a</sup>    | 0.4263        | 1424 (1264 - 1900)    |
| %CCR6+ in ILC1                  | 13.05 (5.09 - 27.83)               | 9.75 (5.97 - 30.53)                | 0.6698        | 10.40 (4.76 - 24.30)  |
| %CCR6+ in CD161+ ILC1           | 86.75 (74.80 - 94.18)              | 87.25 (80.88 - 92.85)              | 0.9460        | 88.60 (75.70 - 96.60) |
| %CCR6+ in CD161- ILC1           | 3.85 (2.30 - 7.58)                 | 3.91 (1.04 - 6.22)                 | 0.4631        | 3.04 (1.58 - 5.67)    |
| ILC2/ul                         | 0.17 (0.10 - 0.32)                 | 0.56 (0.14 - 0.80)                 | <b>0.0061</b> | 0.61 (0.44 - 1.00)    |
| CD161- ILC2/ul                  | 0.04 (0.03 - 0.18)                 | 0.38 (0.08 - 0.69)                 | <b>0.0039</b> | 0.38 (0.32 - 0.56)    |
| %CD161- in ILC2                 | 41 (28 - 63)                       | 68 (45 - 93)                       | <b>0.0012</b> | 54 (50 - 80)          |
| %CD161+ in ILC2                 | 60.15 (42.53 - 71.20) <sup>b</sup> | 32.70 (6.59 - 55.43)               | <b>0.0006</b> | 45 (19.55 - 49.90)    |
| CD161+ILC2/ul                   | 0.08 (0.02 - 0.12)                 | 0.17 (0.07 - 0.19)                 | 0.1260        | 0.29 (0.14 - 0.39)    |
| %CD69 in ILC2                   | 1 (0 - 1)                          | 17 (9 - 25)                        | <b>0.0266</b> | 0.41 (0.25 - 1.47)    |
| %CD69+ in CD161+ ILC2           | 2 (0 - 6)                          | 0.7 (0 - 3.2)                      | 0.1294        | 0.57 (0.45 - 1.97)    |
| %CD69+ in CD161- ILC2           | 3.03 (0.25 - 5.32)                 | 0.84 (0.37 - 1.43)                 | 0.1099        | 0.19 (0 - 0.36)       |
| %c-kit in ILC2                  | 58 (26 - 70)                       | 19 (8 - 43)                        | <b>0.0007</b> | 50 (11 - 54)          |
| %c-Kit+ CD161+ in ILC2          | 54.65 (21.20 - 69.38)              | 17.35 (4.58 - 30.8)                | <b>0.0017</b> | 41.90 (10.15 - 47.60) |
| CCR10+ ILC2/ul                  | 0.03 (0.01 - 0.06)                 | 0.20 (0.06 - 0.32)                 | <b>0.0002</b> | 0.17 (0.10 - 0.23)    |
| %CCR10 in ILC2                  | 14 (9 - 32)                        | 27 (18 - 46)                       | <b>0.0105</b> | 26 (18 - 309)         |
| %CCR10+ in CD161+ ILC2          | 3 (0 - 7)                          | 5 (2 - 14)                         | 0.3013        | 5 (3 - 6)             |
| %CCR10+ in CD161- ILC2          | 33 (16 - 40)                       | 39 (20 - 58)                       | 0.2163        | 24 (19 - 36)          |
| CCR10 MFI in CCR10+ ILC2        | 3004 (1408 - 4410)                 | 3777 (3151 - 5052)                 | <b>0.0398</b> | 2279 (1861 - 2754)    |
| CCR10 MFI in CCR10+ CD161- ILC2 | 2181 (1718 - 3790)                 | 3708 (3139 - 5134)                 | <b>0.0134</b> | 2549 (2084 - 2976)    |
| CCR10 MFI in CCR10+ CD161+ ILC2 | 1173 (0 - 3059)                    | 1842 (1200 - 3175)                 | 0.2439        | 2253 (1576 - 2543)    |
| %CCR6+ in ILC2                  | 5.77 (1.45 - 29.93)                | 6.66 (1.29 - 17.58)                | 0.7354        | 6.75 (3.29 - 22.30)   |
| %CCR6+ in CD161+ ILC2           | 14.50 (7.48 - 41.30)               | 19.55 (7.55-52.15)                 | 0.1909        | 44.80 (29.20 - 57.00) |
| %CCR6+ in CD161- ILC2           | 0.57 (0 - 4.79)                    | 1.61 (0.02 - 5.09)                 | 0.9492        | 1.35 (0.45 - 1.86)    |
| ILCp/ul                         | 0.06 (0.02 - 0.15)                 | 0.12 (0.05 - 0.21)                 | 0.3848        | 0.31 (0.21 - 0.47)    |
| %CD69 in ILCp                   | 17 (9 - 25)                        | 4 (3 - 6)                          | <b>0.0002</b> | 2 (1 - 4)             |
| %CCR6+ in ILCp                  | 18.30 (6.87 - 34.70)               | 19.05 (10.25 - 35.48)              | 0.9032        | 13.90 (12.30 - 23.35) |
| <b>Serum Levels (pg/ml)</b>     |                                    |                                    |               |                       |
| CCL28 <sup>c</sup>              | 501(483 - 522) <sup>b</sup>        | 515 (484 - 557) <sup>b</sup>       | 0.0906        | 420 (382 - 458)       |
| IL-22BP <sup>c</sup>            | 27942 (18658 - 46010)              | 41824 (26525 - 60111) <sup>b</sup> | 0.2412        | 22070 (16851-24511)   |
| SPD <sup>c</sup>                | 2490 (464 - 10627)                 | 3060 (596 - 7404) <sup>b</sup>     | 0.9999        | 768 (6 - 1830)        |
| RAGE <sup>c</sup>               | 455 (348 - 735) <sup>d</sup>       | 76 (38 - 201)                      | <b>0.0004</b> | 146 (91 - 208)        |
| CCL21                           | 315 (118 - 448) <sup>b</sup>       | 318 (134 - 404) <sup>b</sup>       | 0.7354        | 78 (56 - 160)         |
| CXCL13                          | 90 (75 - 147) <sup>e</sup>         | 38 (21 - 67) <sup>b</sup>          | <b>0.0002</b> | 19 (5 - 28)           |
| CTACK                           | 590 (401 - 852)                    | 614 (406 - 823)                    | 0.8394        | 711 (419 - 775)       |
| EGF                             | 73.3 (132.5 - 279.5)               | 139 (102.9 - 389.4)                | 0.3396        | 127 (35 - 192)        |
| ENA-78                          | 603.9 (331 - 1072)                 | 1227 (816.3 - 1480)                | 0.1937        | 1704 (832 - 1939)     |
| Eotaxin-2                       | 341 (162 - 711)                    | 838 (717 - 1610)                   | <b>0.0002</b> | 745 (236 - 1306)      |
| FGF-2                           | 114 (50 - 137) <sup>b</sup>        | 72 (35 - 137)                      | 0.4143        | 43 (30 - 75)          |
| FLT-3L                          | 13.99 (11.09 - 21.92)              | 9.54 (7.13 - 16.14)                | <b>0.0034</b> | 9 (5 - 17)            |

|                 |                                  |                                 |               |                       |
|-----------------|----------------------------------|---------------------------------|---------------|-----------------------|
| Fractalkine     | 78.99 (48.63 – 218.9)            | 112.4 (43.97 – 194.1)           | 0.7869        | 70 (34 – 267)         |
| G-CSF           | 27 (21 – 47)                     | 9 (2 – 10)                      | <b>0.0002</b> | 5 (0.2 – 39.7)        |
| GM-CSF          | 64 (24 – 118)                    | 27 (22 – 76)                    | <b>0.0215</b> | 19 (15 – 226)         |
| GROalpha        | 43 (33 – 57) <sup>b</sup>        | 35 (34 – 49) <sup>b</sup>       | 0.0942        | 19 (9 – 25)           |
| I-309           | 0.78 (0.64 – 2.47)               | 0.70 (0.39 – 0.99)              | 0.0681        | 0.76 (0.42 – 1.10)    |
| IFN-alpha2      | 56 (14 – 70) <sup>b</sup>        | 23 (10 – 147)                   | 0.9697        | 10 (8 – 46)           |
| IFN-gamma       | 2 (2 – 9)                        | 1 (0.61 – 4.27)                 | 0.1294        | 1.8 (0.3 – 7.6)       |
| IL-1alpha       | 25 (13 – 37)                     | 25 (6 – 34)                     | 0.5417        | 9 (5 – 19)            |
| IL-1beta        | 33 (13 – 48)                     | 27 (5 – 48)                     | 0.6355        | 14 (3 – 32)           |
| IL-1RA          | 14 (10 – 60) <sup>e</sup>        | 11 (8 – 22) <sup>e</sup>        | 0.2163        | 2 (2 – 4)             |
| IL-2            | 2 (0.58 – 3.46)                  | 1 (0.45 – 3.22)                 | 0.3396        | 1 (0.29 – 6.38)       |
| IL-3            | 0.2 (0.15 – 0.29)                | 0.2 (0.18 – 0.29)               | 0.7695        | 0.19 (0.12–0.22)      |
| IL-4            | 2 (1 – 3)                        | 2 (1 – 2)                       | 0.1272        | 0.75 (0.24 – 4.47)    |
| IL-5            | 2 (0.66 – 3.88)                  | 3 (0.88 – 4.71)                 | 0.3757        | 3 (2 – 14)            |
| IL-6            | 21 (5 – 44) <sup>d</sup>         | 4 (1 – 15) <sup>b</sup>         | <b>0.0017</b> | 0.5 (0.2 – 1.2)       |
| IL-7            | 16 (8 – 22) <sup>b</sup>         | 5 (4 – 11)                      | <b>0.0081</b> | 4 (2 – 8)             |
| IL-8            | 18 (18 – 23) <sup>b</sup>        | 18 (15 – 38) <sup>b</sup>       | 0.4548        | 10 (6 – 18)           |
| IL-9            | 4 (2 – 6)                        | 5 (2 – 11)                      | 0.4973        | 4 (2 – 4)             |
| IL-10           | 17 (6 – 50) <sup>d</sup>         | 4 (0.49 – 8.38) <sup>b</sup>    | <b>0.0012</b> | 0.3 (0.1 – 0.6)       |
| IL-12p40        | 62 (29 – 167)                    | 39 (14 – 79)                    | <b>0.0034</b> | 42 (21 – 71)          |
| IL-12p70        | 1 (0.63 – 3.58)                  | 0.72 (0.45 – 7.92)              | 0.3120        | 2.53 (0.28 – 14.69)   |
| IL-13           | 56 (34 – 174)                    | 52 (35 – 173)                   | 0.7354        | 87 (8 – 197)          |
| IL-15           | 27 (21 – 32) <sup>d</sup>        | 19 (13 – 21) <sup>b</sup>       | <b>0.0017</b> | 7 (5 – 8)             |
| IL-17A          | 9 (4 – 16) <sup>b</sup>          | 9 (2 – 20)                      | 0.6848        | 3 (2 – 4)             |
| IL-25           | 219 (194 – 264) <sup>b</sup>     | 219 (90 – 342)                  | 0.8926        | 105 (39 – 171)        |
| IL-17F          | 13 (7 – 20) <sup>d</sup>         | 11 (6 – 19) <sup>b</sup>        | 0.3054        | 5 (5 – 6)             |
| IL-18           | 95 (49 – 145) <sup>b</sup>       | 26 (19 – 69) <sup>b</sup>       | <b>0.0002</b> | 15 (5 – 25)           |
| IL-20           | 5 (3 – 18)                       | 5 (4 – 126)                     | <b>0.0081</b> | 3 (2 – 5)             |
| IL-21           | 3 (2 – 4) <sup>b</sup>           | 3 (2.47 – 3.59) <sup>b</sup>    | 0.5771        | 2 (2 – 3)             |
| IL-22           | 69 (15 – 115)                    | 47 (22 – 102)                   | 0.9999        | 55 (8 – 90)           |
| IL-27           | 3894 (2345 – 5001) <sup>b</sup>  | 2346 (855 – 3184)               | <b>0.0002</b> | 1584 (602–2249)       |
| IL-33           | 28 (2 – 58) <sup>b</sup>         | 16 (2 – 92) <sup>b</sup>        | 0.6377        | 2 (1 – 7)             |
| IP-10           | 1495 (740 – 13957) <sup>d</sup>  | 69 (26 – 185)                   | <b>0.0002</b> | 35 (25 – 50)          |
| LIF             | 5 (4 – 10)                       | 6 (4 – 8)                       | 0.8394        | 6 (4 – 11)            |
| MCP-1           | 374 (304 – 585)                  | 281 (167 – 528)                 | 0.2734        | 458 (253 – 530)       |
| MCP-2           | 86 (81 – 99) <sup>d</sup>        | 23 (21 – 34)                    | <b>0.0005</b> | 20 (19 – 24)          |
| MCP-3           | 18 (11 – 39)                     | 11 (10 – 23)                    | 0.1514        | 10 (5 – 37)           |
| MCP-4           | 9 (4 – 11) <sup>b</sup>          | 14 (5 – 39) <sup>b</sup>        | 0.0574        | 5 (3 – 16)            |
| M-CSF           | 255 (124 – 354) <sup>b</sup>     | 171 (77 – 219) <sup>e</sup>     | <b>0.0081</b> | 52 (18 – 82)          |
| MDC             | 362 (262 – 707)                  | 408 (238 – 521)                 | 0.1909        | 899 (744 – 1344)      |
| MIG_CXCL9       | 1662 (1026 – 4134)               | 1573 (1111 – 2531)              | 0.2163        | 1044 (974 – 1369)     |
| MIP-1alpha      | 25 (20 – 31)                     | 23 (18 – 27)                    | 0.6724        | 20 (18 – 41)          |
| MIP-1beta       | 32 (20 – 43)                     | 53 (36 – 61) <sup>b</sup>       | <b>0.0002</b> | 21 (16 – 34)          |
| MIP-1delta      | 2176 (1223 – 3388) <sup>e</sup>  | 2676 (1378 – 3683) <sup>d</sup> | 0.1677        | 821 (475 – 918)       |
| PDGF-AA         | 3807 (3172 – 4140) <sup>d</sup>  | 3642 (2342 – 5306) <sup>b</sup> | 0.8394        | 2255 (1490 – 2441)    |
| PDGF-AB_BB      | 19922 (16423 – 23458)            | 22545 (19112 – 27973)           | 0.2734        | 21517 (15029 – 26297) |
| RANTES          | 2442 (921 – 2869)                | 1980 (1251 – 2799)              | 0.8926        | 2388 (2013 – 3509)    |
| sCD40L          | 6797 (4907 – 13568) <sup>b</sup> | 7363 (4004 – 17234)             | 0.4143        | 4353 (2470 – 6572)    |
| SCF             | 0.33 (0.09 – 6.75)               | 0.72 (0.32 – 1.61)              | 0.4143        | 0.24 (0.04 – 0.75)    |
| SDF-1alpha+beta | 1589 (668 – 2154)                | 1815 (540 – 3597)               | <b>0.0398</b> | 2497 (1649 – 4000)    |
| TARC            | 16 (7–21) <sup>b</sup>           | 28 (12 – 30)                    | <b>0.0327</b> | 25 (17 – 52)          |
| TGFalpha        | 34 (15 – 39) <sup>b</sup>        | 15 (10 – 26) <sup>b</sup>       | <b>0.0327</b> | 9 (8 – 10)            |
| TNFalpha        | 170 (83 – 203)                   | 62 (43 – 172)                   | <b>0.0134</b> | 44 (19 – 203)         |
| TNFBeta         | 21 (14 – 43)                     | 19 (12 – 31)                    | 0.2036        | 12 (7 – 29)           |
| TPO             | 795 (379 – 1426) <sup>b</sup>    | 862 (345 – 2069) <sup>b</sup>   | 0.5879        | 249 (236 – 442)       |
| TRAIL           | 27 (19 – 46) <sup>b</sup>        | 55 (44 – 73)                    | <b>0.0295</b> | 61 (49 – 77)          |
| TSLP            | 2 (1 – 10)                       | 5 (1 – 15) <sup>b</sup>         | 0.8525        | 1 (1 – 2)             |
| VEGF-A          | 382 (283 – 727)                  | 467 (269 – 558)                 | 0.5417        | 180 (97 – 387)        |

Data are shown as Median (Interquartile Range). Comparison of 13 patients with admission and recovery time-points using Wilcoxon matched-pairs signed rank test. P values <0.05 were considered significant and are highlighted in bold. Serum levels were only performed in 6 out of the 9 healthy subjects studied (4 male/6, median age 59 (57–61) years). Mann-Whitney U-test was performed to compare admission and recovery with the controls. <sup>a</sup> P values <0.01 as compared to controls; <sup>b</sup> P values <0.05 as compared to controls; <sup>c</sup> Quantified using an ELISA kit, all the rest were quantified using Multiplexing LASER Bead. Assay; <sup>d</sup> P values <0.0001 as compared to controls; <sup>e</sup> P values <0.001 as compared to controls.

**Supplementary Table 3. Monoclonal Antibodies used in Flow Cytometry Staining**

| <b>Antibody</b>     | <b>Fluorochrome</b> | <b>Clone</b> | <b>Source</b>   |
|---------------------|---------------------|--------------|-----------------|
| CD123               | BV421               | 6H6          | Biolegend       |
| CD11c               | BV421               | 3.9          | Biolegend       |
| CD14                | EF450               | 61D3         | eBioscience     |
| CD19                | EF450               | H1B19        | eBioscience     |
| CCR6                | BV510               | 11A9         | BD Horizon      |
| CD45                | BV605               | HI30         | BD Horizon      |
| CD56                | BV650               | HCD56        | Biolegend       |
| CD4                 | BV711               | RPA-T4       | Biolegend       |
| CD69                | BV785               | FN50         | Biolegend       |
| CD161               | FITC                | DX12         | BD Biosciences  |
| c-Kit               | PerCPef710          | 104D2        | eBioscience     |
| CCR10               | PE                  | 1B5          | BD Pharmingen   |
| CD3                 | PEdazzle594         | UCHT1        | Biolegend       |
| CD25                | PE-Cy5              | BC96         | Biolegend       |
| CD94                | PE-Cy7              | DX22         | Biolegend       |
| CRTH2               | Alexa647            | BM16         | BD Pharmingen   |
| CD16                | AF700               | 3G8          | Biolegend       |
| CD127               | APCef780            | eBioRDR5     | Invitrogen      |
| CD27                | BV421               | M-T271       | BD Horizon      |
| IgM                 | BV510               | MHM-88       | Biolegend       |
| CD4                 | V500                | RPA-T4       | BD Horizon      |
| IgD                 | BV605               | IA6-2        | Biolegend       |
| CD8 $\alpha$        | BV605               | RPA-T8       | Biolegend       |
| HLA-DR              | BV650               | L243         | Biolegend       |
| CD21                | BV711               | B-ly4        | BD Horizon      |
| CD45RO              | BV785               | UCHL1        | Biolegend       |
| CCR7                | FITC                | 150503       | R&D Systems     |
| CD3                 | PerCP Cy5.5         | OKT3         | eBioscience     |
| CD56                | PE                  | C5.9         | Cytognos        |
| CXCR5               | PE Dazzle594        | J252D4       | Biolegend       |
| CD38                | PE-Cy5              | HIT2         | Biolegend       |
| TCR- $\gamma\delta$ | PE-Cy7              | 11F2         | BD Biosciences  |
| CD19                | PE-Cy7              | J3-119       | Beckman Coulter |
| CD25                | APC                 | 2A3          | BD Biosciences  |

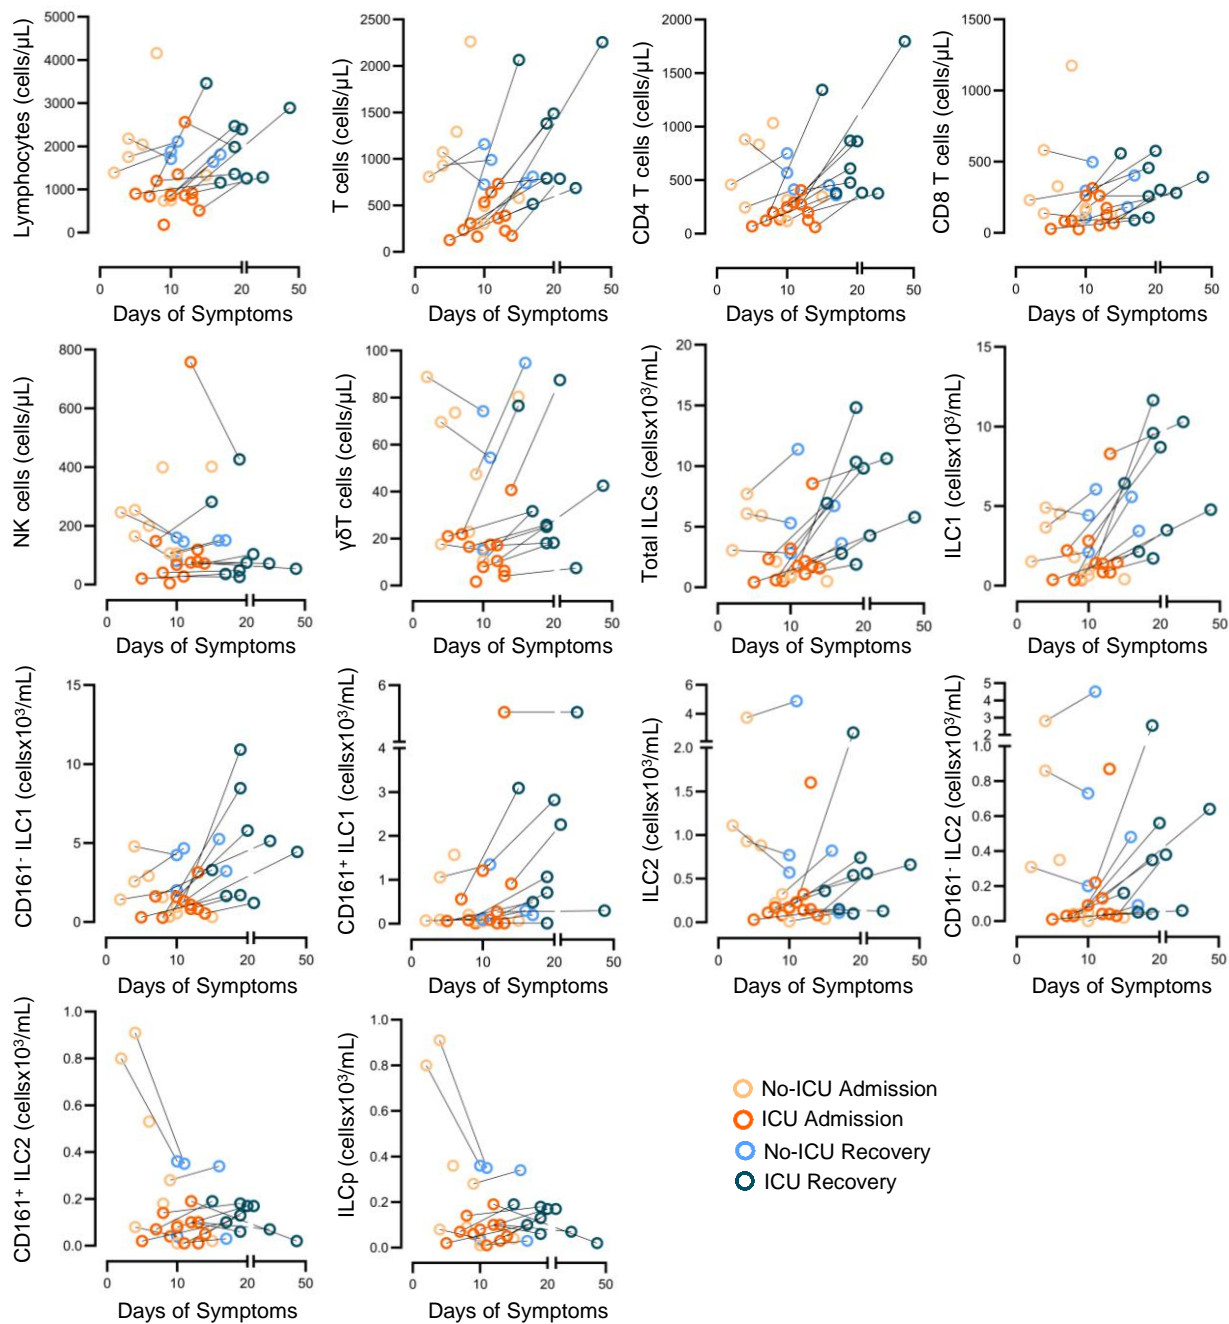

**Supplementary Figure 1.** *Peripheral blood counts of the main ILC populations and other lymphocyte subsets in relation to time since the beginning of symptoms. Data from 20 COVID-19 patients, with 14 patients contributing with two time-points (admission and recovery). Each dot represents one individual / time-point.*

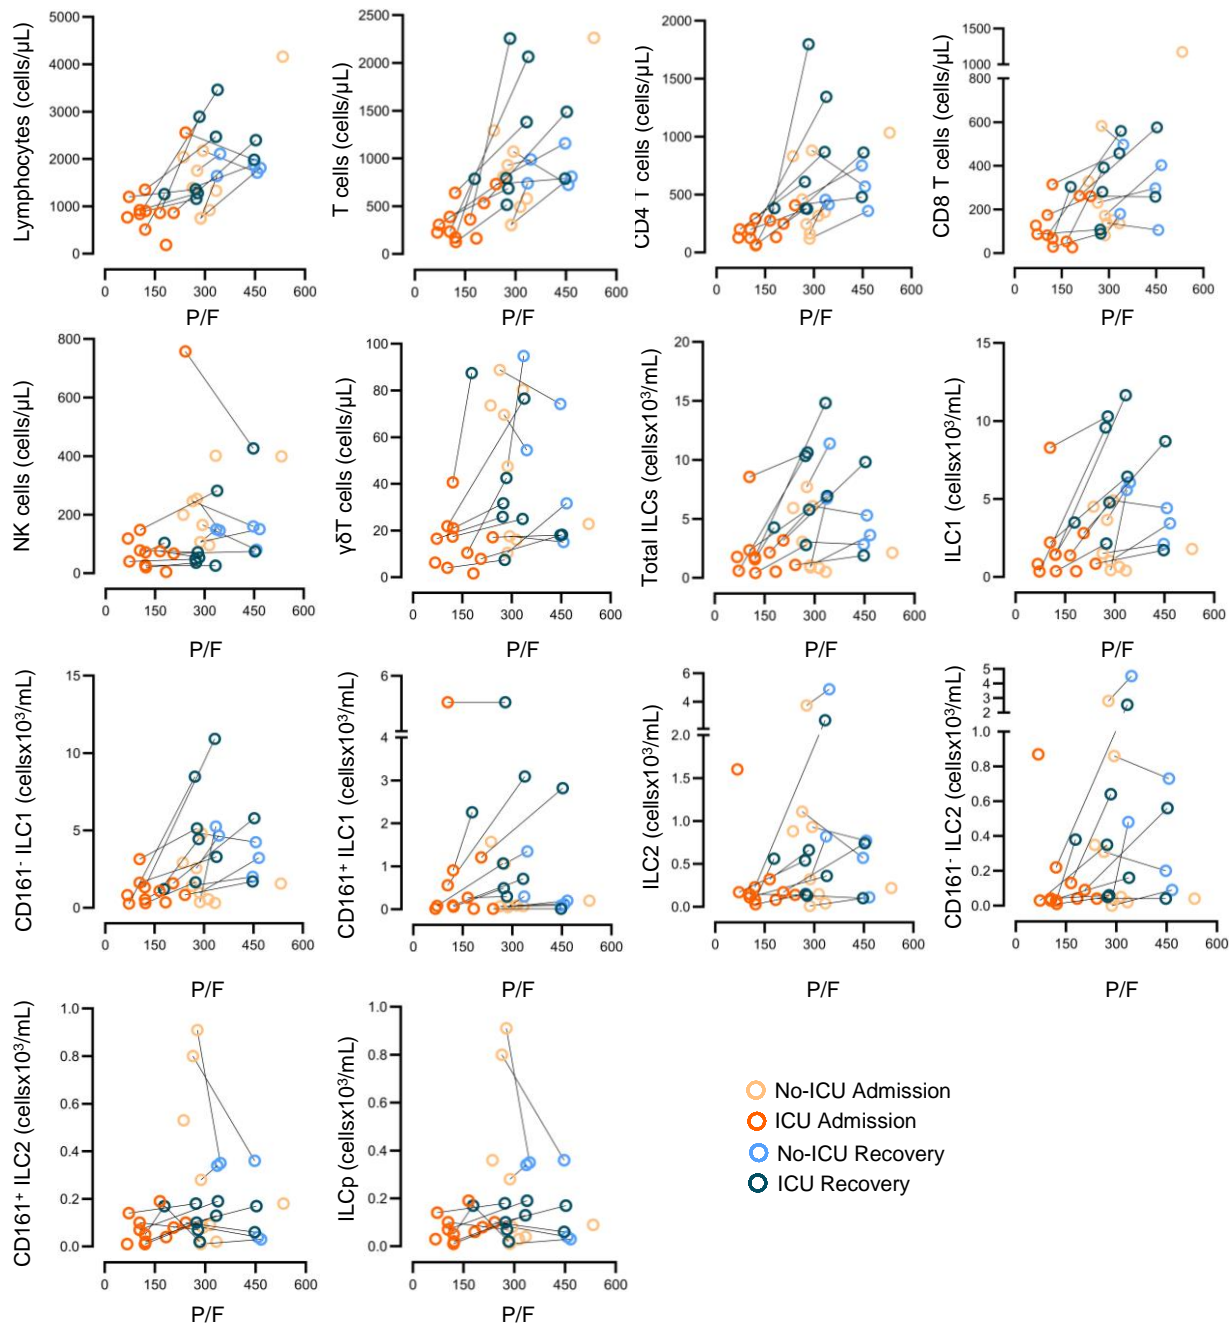

**Supplementary Figure 2.** Peripheral blood counts of the main ILC populations and other lymphocyte subsets in relation to P/F. Data from 20 COVID-19 patients, with 14 patients contributing with two time-points (admission and recovery). Each dot represents one individual / time-point.





**A**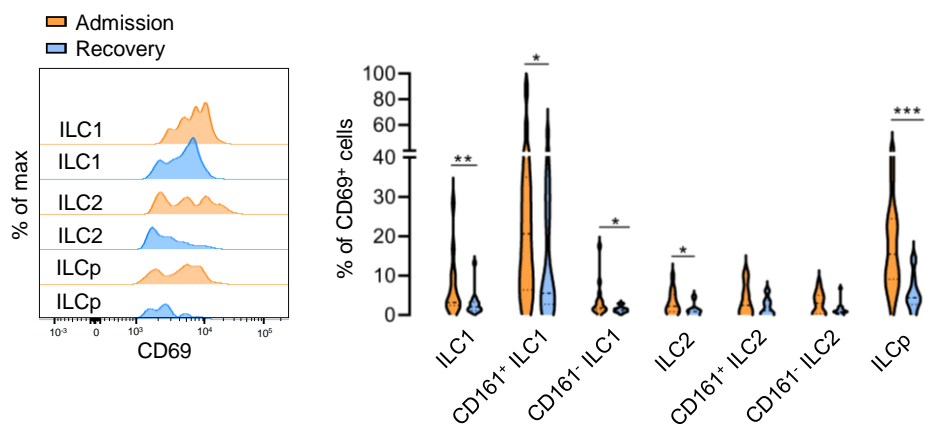**B**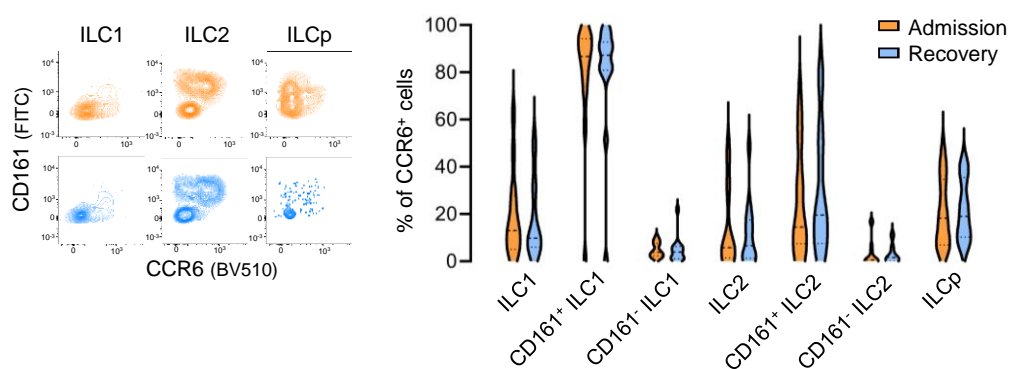**C**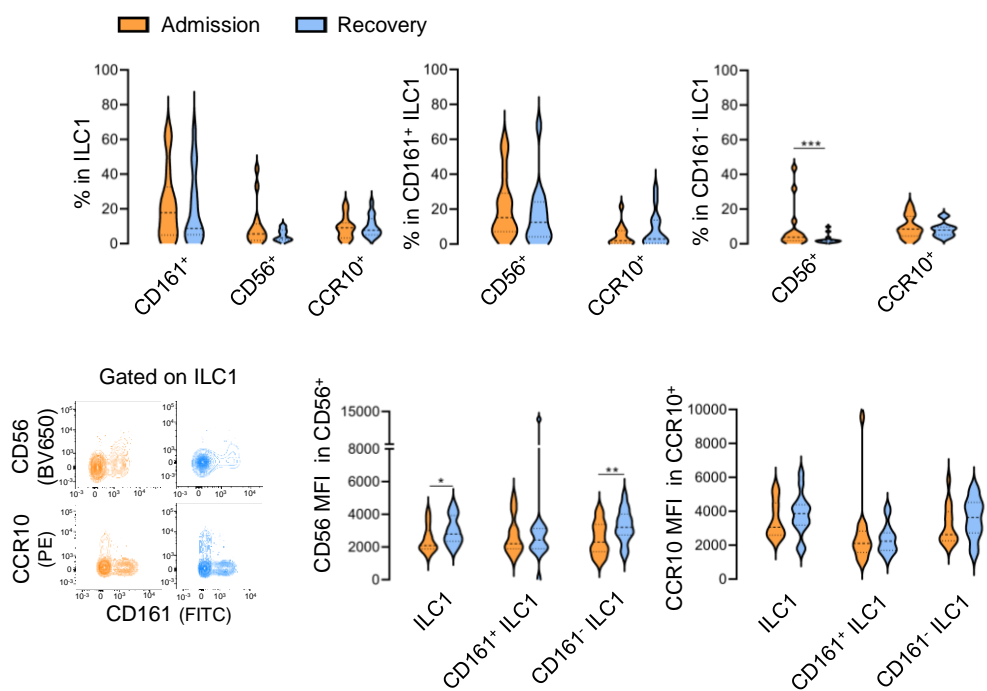

**Supplementary Figure 4.** *ILC phenotype in COVID-19 patients at admission and recovery.* (A) Histogram overlay representing the expression of CD69 within ILC1, ILC2 and ILCp at the admission and recovery time points; the violin plots show the comparison of the frequency of CD69-expressing cells within the main ILC populations at admission and recovery. (B) Contour plots of CCR6 vs CD161 within ILC1, ILC2 and ILCp from a representative patient at admission and recovery; the violin plots show the comparison of the frequency of CCR6-expressing cells within the main ILC populations at admission and recovery. (C) Contour plots of CD56 and CCR10 vs CD161 of a representative patient at admission and recovery; the violin plots show the comparison of the frequency of CD161+, CD56+ and CCR10+ cells within ILC1, the frequency of CD56+ and CCR10+ cells within CD161+ and CD161- ILC1, and the MFI of CD56 and CCR10 within ILC1, CD161+ ILC1 and CD161- ILC1 at admission and recovery. Data from 14 patients were compared using Wilcoxon matched-pairs signed ranked test; \*\*\*  $p < 0,001$ ; \*\*  $p < 0,01$ ; \*  $p < 0,05$ . The healthy control values for all parameters are listed in Supplementary Table 2.

**A**

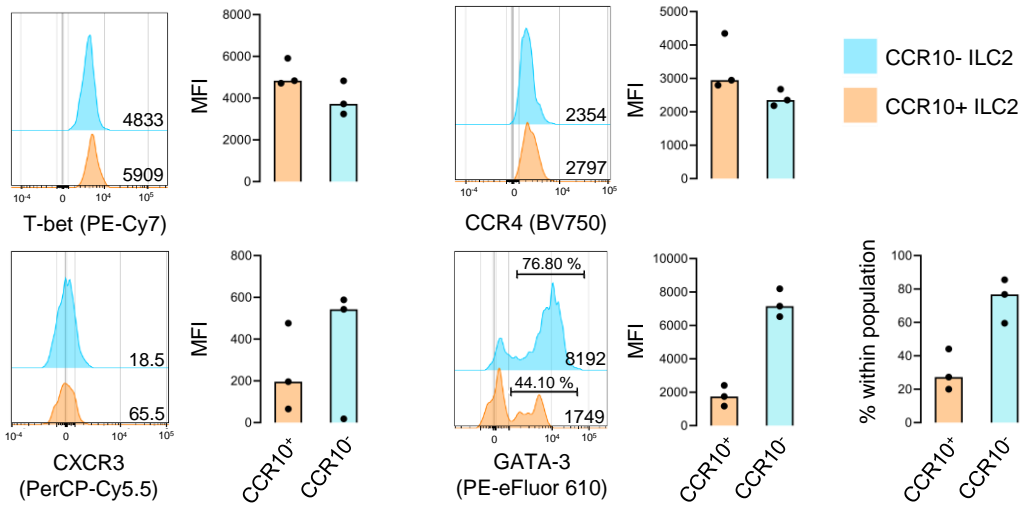

**B**

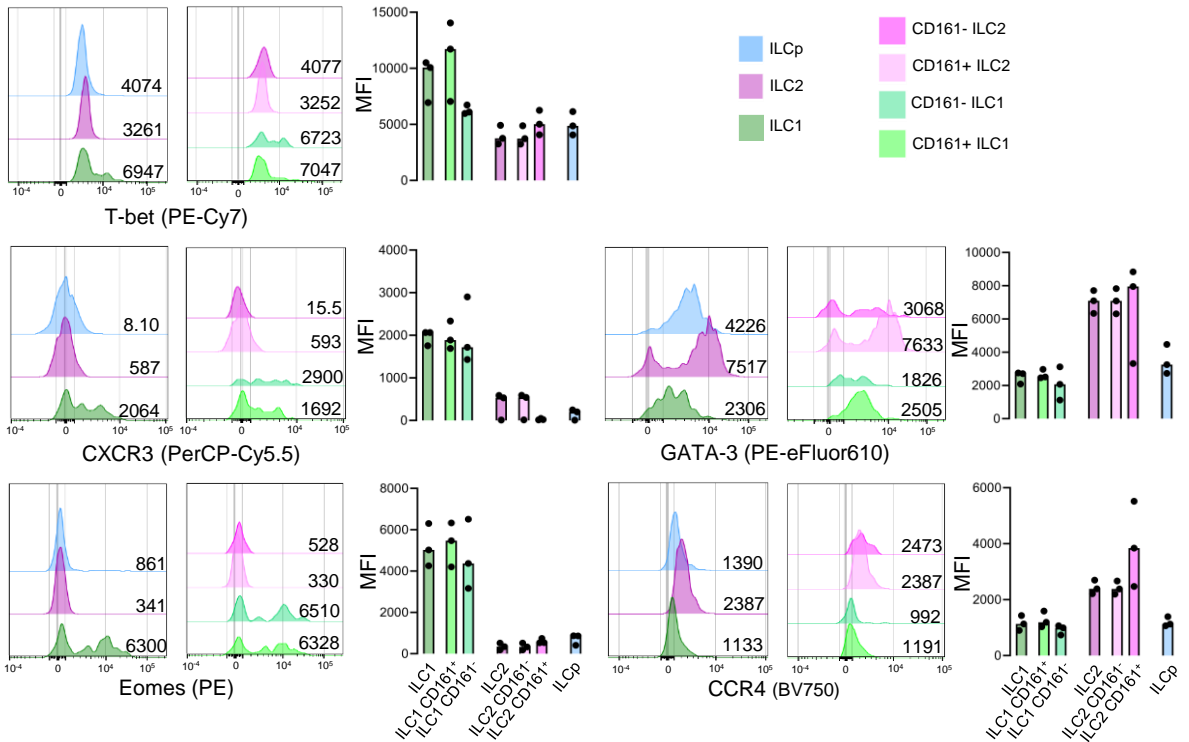

**Supplementary Figure 5. Markers of ILC differentiation.** Expression of GATA-3 (TWAJ, Invitrogen, PE-eFluor610), CCR4 (1G1, BD Biosciences, BV750), Tbet (eBio4B10, eBioscience, PE-Cy7), CXCR3 (1C6, BD Biosciences, PerCPCy5.5), and Eomes (WD1928, eBioscience, PE), in circulating ILC2 subsets according to CCR10 (A) and ILCp, ILC2, and ILC1 in subsets defined by CD161 (B) in healthy donors (n=3). Samples were acquired in Aurora flow cytometer (Cytek Biosciences, Fremont, CA), histogram refers to one illustrative individual and numbers refer to Mean Fluorescence Intensity (MFI). Bars refer to the median of the MFI or frequency of the population and each dot represents one individual.

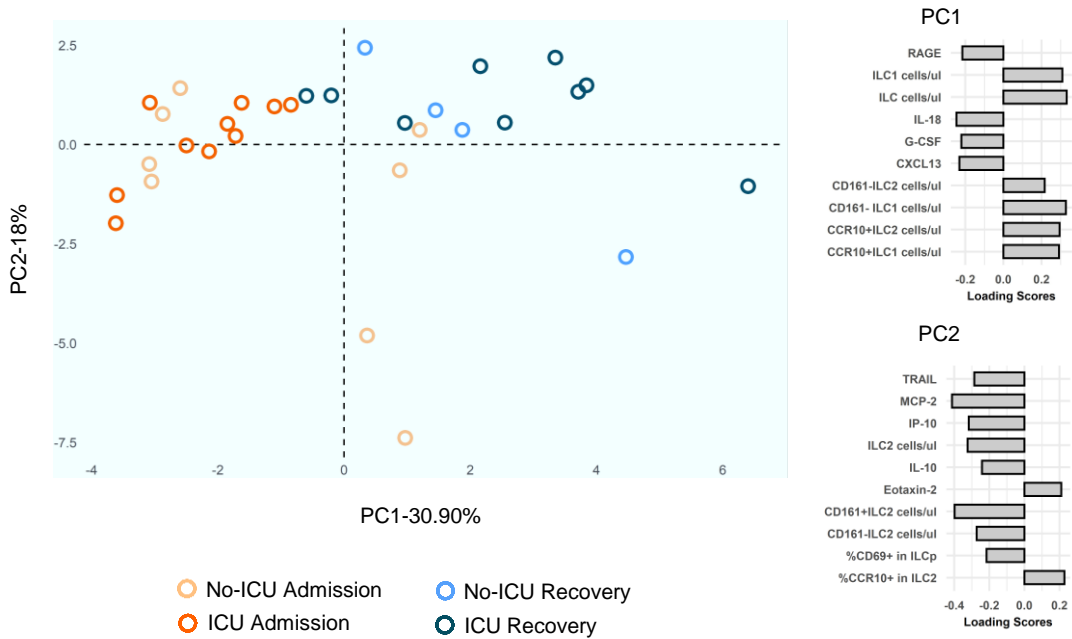

**Supplementary Figure 6.** *Identification of major contributors to disease recovery.* PCA analysis of the 22 analytes and cell populations with a significant fold change  $> |2|$  within the 2 patient groups, No-ICU and ICU, at admission and recovery. The top 10 loading scores in absolute value of PC1 and PC2 are represented. Each dot represents one patient.
